# Supplementary material
Source: PubMed Central journal article supplement (PMC8657536)
Supplement: JGS-69-3389-s001.pdf [file JGS-69-3389-s001.pdf]

Supplementary Figure S1. Distribution of ADRD codes by month in 2020 vs. 2019

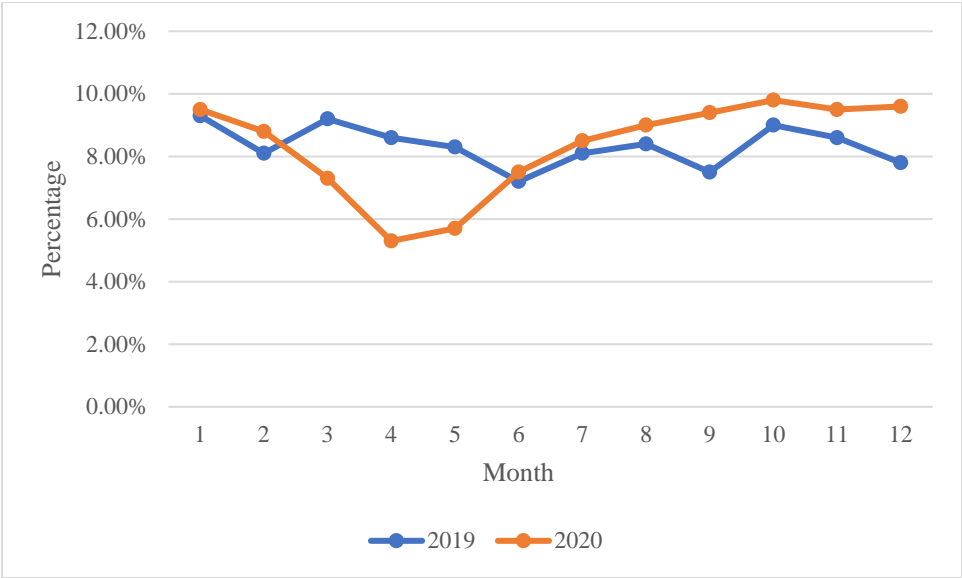

Supplementary Table S1. Association between demographic characteristics and ADRD diagnosis via telehealth (phone and video) vs. face-to-face

|                                                | Encounters/Total | Odds Ratio<br>(95% CI) | P-value |
|------------------------------------------------|------------------|------------------------|---------|
| <b>Univariate Logistic Regression Models</b>   |                  |                        |         |
| <b>Age</b>                                     |                  |                        |         |
| 65-74                                          | 270/738          | Reference              |         |
| 75-84                                          | 654/1698         | 1.09 (0.91-1.30)       | 0.37    |
| >=85                                           | 656/1412         | 1.50 (1.25-1.81)       | <.0001  |
| <b>Gender</b>                                  |                  |                        |         |
| Male                                           | 625/1603         | Reference              |         |
| Female                                         | 955/2245         | 1.16 (1.02-1.32)       | 0.03    |
| <b>Race/Ethnicity</b>                          |                  |                        |         |
| White                                          | 783/1944         | Reference              |         |
| Asian/Pacific Islander                         | 144/353          | 1.02 (0.81-1.29)       | 0.86    |
| Black                                          | 221/507          | 1.15 (0.94-1.40)       | 0.18    |
| Hispanic                                       | 432/1044         | 1.05 (0.90-1.22)       | 0.56    |
| <b>Spoken Language</b>                         |                  |                        |         |
| English                                        | 1322/3228        | Reference              |         |
| Non-English                                    | 258/620          | 1.03 (0.86-1.22)       | 0.76    |
| <b>Multivariable Logistic Regression Model</b> |                  |                        |         |
| <b>Age</b>                                     |                  |                        |         |
| 65-74                                          | 270/738          | Reference              |         |
| 75-84                                          | 654/1698         | 1.08 (0.90-1.29)       | 0.39    |
| >=85                                           | 656/1412         | 1.50 (1.25-1.80)       | <.0001  |
| <b>Gender</b>                                  |                  |                        |         |
| Male                                           | 625/1603         | Reference              |         |
| Female                                         | 955/2245         | 1.13 (0.99-1.29)       | 0.07    |
| <b>Race/Ethnicity</b>                          |                  |                        |         |
| White                                          | 783/1944         | Reference              |         |
| Asian/Pacific Islander                         | 144/353          | 1.02 (0.80-1.29)       | 0.89    |
| Black                                          | 221/507          | 1.16 (0.95-1.42)       | 0.14    |
| Hispanic                                       | 432/1044         | 1.06 (0.88-1.27)       | 0.56    |
| <b>Spoken Language</b>                         |                  |                        |         |
| English                                        | 1322/3228        | Reference              |         |
| Non-English                                    | 258/620          | 1.03 (0.84-1.28)       | 0.75    |
